1 **Full title: Impacts of climate change on diarrhoeal**  
2 **disease hospitalisations: how does the Global**  
3 **Warming Targets of 1.5 - 2°C affect Dhaka,**  
4 **Bangladesh?**

5 **Short title: Climate change and diarrhoea in Dhaka,**  
6 **Bangladesh**

7 Farhana Haque<sup>1,2\*</sup>, Fiona C Lampe<sup>1</sup>, Shakoor Hajat<sup>3</sup>, Katerina Stavrianaki<sup>4</sup>, S. M.  
8 Tafsir Hasan<sup>5</sup>, ASG Faruque<sup>5</sup>, Tahmeed Ahmed<sup>5</sup>, Shamim Jubayer<sup>6</sup>, Ilan Kelman<sup>7,8</sup>

9 <sup>1</sup>Institute for Global Health (IGH), University College London (UCL), London, UK

10 <sup>2</sup>UK Public Health Rapid Support Team (UK-PHRST), Department of Infectious  
11 Disease Epidemiology, London School of Hygiene and Tropical Medicine (LSHTM),  
12 London, UK

13 <sup>3</sup>Department of Public Health, Environments and Society, London School of Hygiene  
14 and Tropical Medicine (LSHTM), London, UK

15 <sup>4</sup>Department of Statistical Science, Institute for Risk and Disaster Reduction (IRDR),  
16 University College London (UCL), London, UK

17 <sup>5</sup>Nutrition and Clinical Services Division, icddr,b, Dhaka, Bangladesh

18 <sup>6</sup>National Heart Foundation Hospital and Research Institute (NHF&RI), Dhaka,  
19 Bangladesh

20 <sup>7</sup>Institute for Global Health (IGH) and Institute for Risk and Disaster Reduction  
21 (IRDR), University College London (UCL), London, UK

22 <sup>8</sup>University of Agder, Kristiansand, Norway

23

24 **\*Corresponding author:**

25 **NOTE:** This preprint reports new research that has not been certified by peer review and should not be used to guide clinical practice.  
Email address: [farhana.haque@lshtm.ac.uk](mailto:farhana.haque@lshtm.ac.uk); [farhana.haque@alumni.ucl.ac.uk](mailto:farhana.haque@alumni.ucl.ac.uk)

26 Current postal Address: Room 118, Keppel Street, London, WC1E 7HT, UK

27

28 **Keywords:** climate change, diarrhoeal disease, global warming, diarrhoea,  
29 Bangladesh

30 Email address: [farhana.haque@lshtm.ac.uk](mailto:farhana.haque@lshtm.ac.uk); [drfarhana2007@gmail.com](mailto:drfarhana2007@gmail.com)

31 Keywords: climate change, temperature, diarrhoea, Dhaka, Bangladesh

32 Abstract word count (Limit 300): 284

33 Main text word count (excluding tables, figures, and references): 4,432

34

## 35 **Abstract**

36 Dhaka is one of the world's densely populated cities and faces significant  
37 public health challenges including high burden of diarrhoeal diseases. Climate  
38 change is intensifying existing environmental problems including urban heat island  
39 effect and poor water quality. While numerous epidemiological studies have linked  
40 meteorological factors to diarrhoeal diseases in Bangladesh, assessment of the  
41 impacts of future climate change on diarrhoeal diseases is scarce. We provide the  
42 assessment of climate change impacts on diarrhoeal disease in Dhaka and project  
43 future health risks under climate change scenarios. About 3 million acute diarrhoea  
44 cases presenting to the Dhaka Hospital of the International Centre for Diarrhoeal  
45 Disease Research Bangladesh (icddr,b) during 1981 - 2010 were linked to daily  
46 temperature, rainfall and humidity and association investigated using time series  
47 adapted negative binomial regression models employing constrained distributed lag  
48 linear models. The findings were applied to climate projections to estimate future  
49 risks of diarrhoea under various global warming scenarios. There was a significantly  
50 raised risk of diarrhoea hospitalisation in all ages with daily mean temperature (RR:  
51 3.4, 95% CI: 3.0 – 3.7) after controlling for the confounding effects of heavy rainfall,  
52 humidity, autocorrelations, day of the week effect, long-term time, and seasonal  
53 trends. Using the incidence rate ratio (IRR) of 1.034, temperature increases based  
54 on the global warming targets of 1.5 – 2°C could result in an increase of diarrhoea  
55 hospitalisations by 4.5 – 7.4% in all age groups by the 2100s. These effects were  
56 more pronounced among <5 children where the predicted temperature increases  
57 could raise diarrhoea hospitalisation by 5.7% - 9.4%. Diarrhoea hospitalisation will  
58 increase significantly in Dhaka even if the global warming targets adopted by the

59 Paris Agreement is reached. This underscores the importance of preparing the city  
60 for management and prevention of diarrhoeal diseases.

61

## 62 Introduction

63           The global mean surface temperature is projected to rise by 2.6°C–4.8°C  
64 under the high emissions scenarios in 2100 even if all countries reduce their  
65 greenhouse gas emissions as pledged in the Paris Agreement [1]. Such temperature  
66 increase poses significant threat to the human society as global warming can  
67 adversely affect human health and wellbeing, particularly in the low- and middle-  
68 income countries (LMICs) that have little economic capacity to take adequate  
69 mitigation and adaptation measures [2-4]. Climate change is projected to exert  
70 significant impact on hydrological systems, water availability and water quality. As a  
71 result, waterborne diseases, particularly diarrhoeal diseases are expected to be  
72 adversely affected by the impacts of climate change [5, 6]. Diarrhoeal diseases, with  
73 an estimated annual global incidence of 2.39 billion episodes and 1.3 million deaths  
74 in all ages according to the global burden of disease study in 2015, remain one of  
75 the leading causes of morbidity and mortality worldwide [7]. Given the high baseline  
76 rates, even a small increase in risk stemming from climate change can significantly  
77 increase public health burdens in the LMICs.

78  
79           Despite the concerns that climate change can cause excess diarrhoea, only a  
80 limited number of studies have attempted to quantify the effects of climate change on  
81 diarrhoea across the globe with variable results [8-10]. Using projections from one  
82 climate model and empirical data from two studies conducted in Fiji [11] and Peru  
83 [12], one study inferred that global warming of 1°C by the 2030s will lead to an  
84 increase in diarrhoea by 0–10% [8]. Another study projected increases of 8–11% in  
85 relative risks of diarrhoea by 2010 – 2039 using data from five empirical studies  
86 across the globe and 19-member climate model ensemble [9]. On the other hand,

87 Moors et al. (2013) calculated increases of 0–21% in diarrhoea by the 2040s, using  
88 the latest regional climate projections for northern India [10]. A recent study  
89 projected over a 10% rise in heat-related diarrhoeal diseases in the Gaza Strip,  
90 Palestine under the 2 °C global warming scenario [13].

91 Bangladesh is a low- and middle-income country (LMIC) in Southeast Asia  
92 with a low-lying topography, poor infrastructure and high population density [14].  
93 Bangladesh has been classified in the Sixth Assessment Report of the  
94 Intergovernmental Panel on Climate Change (IPCC) as a country that is highly  
95 vulnerable to the adverse impacts of climate change [1]. As temperatures continue to  
96 rise and rainfall becomes more erratic, water stress and food insecurity may increase  
97 in Bangladesh [14]. Though Bangladesh has made strong progress towards ensuring  
98 better quality drinking water—the switching to improved water infrastructure—much  
99 of what is tapped remains contaminated with dangerous microbes, heavy metals, or  
100 salt. Moreover, infrastructure alone may not ensure quality of drinking water supplies  
101 at all times [15]. Diarrhoeal disease is endemic in Bangladesh. While the exact  
102 prevalence estimate of diarrhoea is lacking in Bangladesh, diarrhoea is a major  
103 cause of morbidity in the country [7]. According to the Bangladesh Demographic and  
104 Health Surveys (BDHS), the reported prevalence of diarrhoea in the previous two  
105 weeks among under-five children was 5.7% and the prevalence of diarrhoea with  
106 blood was 1% in 2014. Despite meeting the water MDG target successfully in 2010,  
107 outbreaks and hyper-endemicity of diarrhoeal diseases continue to plague the  
108 developing nations including Bangladesh [16]. With more than an estimated 76  
109 million people affected with diarrhoeal disease episodes in all age groups in  
110 Bangladesh during 2015 [7], the potential impact of long term variability in the

111 climate on the incidence of diarrhoeal disease in the future could be concerning for  
112 Bangladesh.

113

114 This study aims to assess the impacts of meteorological factors on acute  
115 diarrhoeal disease in Dhaka, Bangladesh using daily time-series datasets and  
116 quantify the effects of temperature increase under future climate change scenarios.

117

## 118 **Materials and methods**

### 119 **Study setting**

120 Dhaka, located at 23°42'N 90°22'E on the eastern banks of the Buriganga  
121 River, is the capital and largest city of Bangladesh. Tropical vegetation and moist  
122 soils characterize the land, which is flat and close to sea level. Dhaka, a low-lying,  
123 predominantly coastal city surrounded by five major rivers and 50 water channels, is  
124 at risk of flooding from rising sea levels [17]. Several dykes and embankments and  
125 interim boundaries created to protect Dhaka from flooding together with inadequate  
126 drainage and water pumping systems frequently results in water logging of the  
127 protected city area during the monsoons [18]. With a density of 23,234 people per  
128 square kilometres within a total area of 300 square kilometres of the city area, Dhaka  
129 city faces a number of environmental and societal challenges including urban heat  
130 island effect, insufficient infrastructure, poor water quality, inadequate sanitation,  
131 inadequate waste management, poor hygiene brought about by poverty [19, 20].

## 132 **Health data**

133 Data on the daily number of acute diarrhoea cases (defined as patients  
134 passing  $\geq 3$  loose stools per 24h due to any cause) presenting to the Dhaka Hospital  
135 of the International Centre for Diarrhoeal Diseases Research, Bangladesh (icddr,b)  
136 between 1981–2010 were obtained on 7 October 2020. The Dhaka hospital is the  
137 largest diarrhoeal disease hospital that predominantly served an urban population of  
138 approximately 14.7 million and provided free treatment to more than 140,000  
139 patients with diarrhoea in 2010 [21]. Given that reliable records of the total number of  
140 patients with acute diarrhoea admitted per day or their disease onset dates were not  
141 available for the study period (1981–2010), information from the Diarrhoeal Disease  
142 Surveillance System (DDSS) was obtained instead to estimate the total number of  
143 patients hospitalised with diarrhoea per day. The DDSS was established in 1979 to  
144 record the information of a sample of acute diarrhoea patients who sought care from  
145 the icddr,b Dhaka Hospital [22]. During 1981–1995, the DDSS enrolled every 25th  
146 patient and during 1996–2010, the DDSS enrolled every 50th patient who were  
147 admitted in the icddr,b Dhaka Hospital into the surveillance system. The Dhaka  
148 Hospital began keeping electronic records of all patients seeking care since 2010  
149 [23]. We did not access any information that could identify individual participants  
150 during or after data collection. We did not collect any data beyond the study period.  
151 Additional information on health data is provided in the supplementary material (S1  
152 File).

## 153 **Meteorological data**



154 Daily climate parameters including mean, maximum and minimum  
155 temperature, cumulative rainfall, and relative humidity between 1 January 1980 and  
156 31 December 2010 for Dhaka City were collected from the Bangladesh  
157 Meteorological Department (BMD). The BMD maintains 3-hourly records of  
158 temperature data from three validated weather stations across Dhaka. All data are  
159 publicly accessible at <https://bmd.gov.bd/>.

160 While climate projections for Dhaka city are limited, a study projected an  
161 increase in maximum temperature by 1.3 – 4.3°C in Bangladesh for different  
162 representative concentration pathway (RCP) scenarios using the Coupled Model  
163 Intercomparison Project Phase 5 (CMIP5) global climate models (GCMs) models by  
164 the 2100 [24]. Various regional climate models (RCMs) using different IPCC  
165 greenhouse gas emission scenarios predicted a likely increase in the mean  
166 temperature by 1 – 3°C during 2030 – 2060 in Bangladesh [25]. Another study  
167 projected change of mean surface air temperature in different months by 0.5 – 2.1°C  
168 and 0.9 – 3.5°C for the year 2050 and 2060, respectively [26]. For the SRES A1B  
169 emissions scenario (representing a future world of very rapid economic growth, low  
170 population growth and rapid introduction of new and more efficient technology), the  
171 projected temperature increases over the entire country are in the region of 3 to  
172 3.5°C by the 2100s according to the UK’s Met Office Hadley Centre [27]. On the  
173 other hand, a study based on an ensemble of projections using the high resolution  
174 (10 km) MIT Regional Climate Model (MRCM) projected an increase of 1.2 – 1.3°C  
175 in daily maximum temperature by the 2050s for Bangladesh compared to a reference  
176 period of 1976 – 2005. Using statistical downscaling model, one study predicted an  
177 increase of 2.7°C and 2.1°C in average annual maximum and minimum temperature  
178 per century [28]. Using multi-model ensemble (MME) of 40 CMIP5 GCMs, a recent

179 study showed that mean annual maximum temperature over Bangladesh will  
180 increase by 0.61-1.75°C in the near future (2021-2060) and 0.91 – 3.85°C in the far  
181 future (2071-2100) [14]. Given that different climate projections suggest a variable  
182 increase in daily temperature across Bangladesh ranging between 0.91 – 4.3°C by  
183 the 2100s and because climate projections are prone to biases [9], we estimated the  
184 increased risk of diarrhoea under various projected temperatures. In addition, we  
185 estimated the increase in relative risk of diarrhoea hospitalisation for the global  
186 warming targets agreed in the Paris Agreement since many countries have  
187 reaffirmed their commitment to hold the increase in global average temperature to  
188 1.5 – 2°C above the pre-industrial levels.

## 189 **Additional data**

190 Additional socio-economic data for sensitivity analyses were collected as  
191 follows: yearly total urban population projections for Dhaka was collected from the  
192 UN population prospects; the annual gross domestic product (GDP) per capita in  
193 Bangladesh was obtained from the Nationmaster website; literacy rate was obtained  
194 from the Bangladesh Bureau of Statistics and the 5-yearly data on access to  
195 improved water supply and sanitation were obtained from the Demographic and  
196 Health Surveillance (DHS) and the Joint Monitoring Programme (JMP). To compare  
197 how diarrhoea hospitalisation rates compared with national trends, we additionally  
198 collected annual diarrhoea hospitalisation and death data from the website of the  
199 Department of Health Services of the Ministry of Health and Family Welfare,  
200 Bangladesh ([https://old.dghs.gov.bd/index.php/en/publications/health-bulletin/dghs-](https://old.dghs.gov.bd/index.php/en/publications/health-bulletin/dghs-health-bulletin)  
201 [health-bulletin](https://old.dghs.gov.bd/index.php/en/publications/health-bulletin/dghs-health-bulletin)).

202

## 203 **Analysis**

### 204 **Epidemiological analysis to model baseline impacts**

205           Negative binomial time-series regression models were used to assess acute  
206 associations between daily diarrhoea hospitalisation and daily ambient temperature,  
207 relative humidity and heavy rainfall (defined as the rainfall  $\geq 95^{\text{th}}$  percentile for the  
208 study period). A series of linear-spline functions of time were used to flexibly model  
209 underlying long-term trends and seasonal patterns in the health data unrelated to  
210 climate factors [23, 29]. Seasonally adjusted negative binomial model was used to  
211 allow for overdispersion and model residuals were lagged by one day to adjust for  
212 the significant residual autocorrelation associated with the day before.

213           Distributed lag linear models (DLLMs) were then employed to model the  
214 delayed effects of each exposure that allowed the relationship to be simultaneously  
215 modelled at different lags of exposure. A maximum lag of 28 days was used to  
216 capture delayed effects. These models suggested a linear risk associated with mean  
217 temperature at lag 0-1 days, humidity at lag 0-3 days and heavy rainfall at lag 0-8  
218 days. The cumulative effects of temperature, humidity or rainfall across all significant  
219 lags were therefore estimated using DLLMs. Although each variable was  
220 investigated separately, the final quantification was based on a model with all  
221 meteorological factors simultaneously entered in a constrained DLLM, which took the  
222 following form:

223

$$\log[E(Y_t)] = \beta_0 + \sum \beta_1 Temp_{t-1} + \sum \beta_2 Hum_{t-3} + \sum \beta_3 HeavyRain_{t-8} + \beta_4 LS(time_t, 8 \text{ D.F.}) + \sum \beta_5 dow + \gamma r_{t-1} \dots \dots \dots 1$$

226

227 where  $E(Y_t)$  is the expected diarrhoea hospitalisation count on day  $t$ ;  $Temp_{t-1}$   
228 indicates the distributed lag of mean temperature at lags 0–1 days; and  $Hum_{t-3}$  and  
229  $HeavyRain_{t-8}$  indicate the distributed lag of relative humidity and heavy rainfall at lags  
230 0–3 and 0–8 days, respectively.  $LS$  indicates a linear spline of time with 8 degrees of  
231 freedom per year;  $dow$  is the categorical day of the week with a reference day of  
232 Friday; and  $r_{t-1}$  is deviance residuals at 1 day lag obtained from the model without  
233 any autoregressive terms. The relative risk was estimated as incidence rate ratio  
234 (IRR) in the model and later converted into percentage.

235 Multiple sensitivity analyses were conducted by changing the amount of  
236 control for seasonality and long-term trends in the model (by using natural cubic  
237 splines and changing the number of knots in the spline-based approach). Further  
238 sensitivity analysis was conducted by including population of Dhaka into the model  
239 as an offset. The analysis was also repeated using the actual number of diarrheal  
240 disease patients enrolled into the DDSS during the study period. In addition, two  
241 separate models using a generalized estimating equations (GEE) approach were  
242 generated to investigate the potential modification by improved WASH interventions  
243 [30]. Diagnostic plots based on deviance residuals were generated for each model to  
244 check the model fit. The best model was chosen based on the lowest BIC value. All  
245 data were analysed using Stata/SE 18.0 (StataCorp, USA).

246

## 247 **Estimating the impact of climate change on diarrhoea**

248 The impact (I) of climate change on diarrhoea hospitalisation in the future was  
249 calculated by multiplying the projected increase in temperature ( $\Delta T$ ) with the  
250 percentage increase in relative risk (RR) of diarrhoea hospitalisations with each  $1^\circ\text{C}$   
251 temperature increase using the formula below:

252  $I = (1 + RR) \times \Delta T$ .....2

253 where RR is the increase in risk percentage of diarrhoea per  $1^\circ\text{C}$  increase in  
254 temperature and  $\Delta T$  is the projected increase in temperature by the 2100s.

## 255 Findings

256 During the 30-year study period between 1 January 1981 and 31 December  
257 2010, approximately 2,983,850 cases of all ages presented to the icddr,b Dhaka  
258 Hospital for acute diarrhoeal disease. Among these, 58% were males and 54% were  
259 children aged  $<5$  years. Figs 1 and 2 show the daily and monthly distributions of  
260 diarrhoea hospitalisation and mean temperature ( $^\circ\text{C}$ ) in Dhaka averaged across  
261 years 1981–2010. Diarrhoea hospitalisation for under 5 children peaked in April  
262 whereas diarrhoea hospitalisation for all ages revealed a large peak in April and a  
263 smaller peak in September (Fig 2).

264

265 **Fig 1. Daily distribution of diarrhoea hospitalisation and ambient temperature**  
266 **averaged across years 1981–2010.**

267 **Fig 2. Monthly distribution of daily diarrhoea hospitalisation in all ages and  $\leq 5$**   
268 **children and meteorological factors averaged across years 1981–2010.**

269

270 According to Fig 3, hospitalisation rates in the Dhaka Hospital showed a  
271 declining trend with improvements in water supply, sanitation and socio-economic  
272 conditions. As evident from Figs 2 and 4, diarrhoea morbidity rates remain  
273 significantly high both in Dhaka and across Bangladesh during the study period.

274 **Fig 3. Demographic, economic, improved water supply access, sanitation**  
275 **coverage and diarrhoea hospitalisation trends in Dhaka, Bangladesh 1981-**  
276 **2010.**

277 **Fig 4. National trends of diarrhoea hospitalisation and deaths in Bangladesh**  
278 **during 2000-2016.**

279

280 Figure 5 shows the seasonally adjusted relationship between temperature  
281 with relative risk of diarrhoea hospitalisation in all ages across multiple lags based on  
282 the DLLM model. There was a linearly increased risk of diarrhoea hospitalisation  
283 associated with temperature on the same day and a decreased risk at lag 1 day with  
284 negligible effects observed until lags of 28 days. The relationship with rainfall  
285 exhibited a broadly linear increased diarrhoea hospitalisation risk with heavy rainfall  
286 and the effect persisting for up to 8 days following exposure. We observed no  
287 increased risk of diarrhoea hospitalisation with low rainfall. In addition, relative  
288 humidity was inversely associated with diarrhoea hospitalisations on the same day  
289 with effects lasting up to 3 days. Using the DLLM, diarrhoea hospitalisations in all  
290 ages and  $\leq 5$  children in Dhaka were estimated to increase by 3.4% (95% CI: 3.0 –  
291 3.7) and 3.9% (3.8 – 4.7) per 1°C increase in daily mean temperature, respectively

292 (Table 1). The results did not change significantly during the sensitivity analyses (S2  
 293 File).

294 **Figure 5. Lagged effects of ambient temperature on diarrhoea hospitalisations**  
 295 **in all ages in Dhaka, Bangladesh.**

296

297

298 **Table 1. Percentage increase in diarrhoea hospitalisation associated with one**  
 299 **unit increase in temperature, rainfall or humidity in Dhaka, Bangladesh.**

| Subgroup | Temperature (Lag 0-1 days)                                          |                 | Rainfall (Lag 0-8 days)                                                              |                 | Humidity (Lag 0-3 days)                                    |                 |
|----------|---------------------------------------------------------------------|-----------------|--------------------------------------------------------------------------------------|-----------------|------------------------------------------------------------|-----------------|
|          | Percentage increase per 1°C rise in daily mean temperature (95% CI) | <i>p</i> -value | Percentage increase per 1 mm rise in daily cumulative rainfall beyond 35 mm (95% CI) | <i>p</i> -value | Percentage decrease per 1% rise in daily relative humidity | <i>p</i> -value |
| All ages | 3.4 (3.0 – 3.7)                                                     | 0.0001          | 2.6 (1.1 – 3.7)                                                                      | 0.0001          | 0.2 (0.1 – 0.2)                                            | 0.0001          |
| ≤5 years | 3.9 (3.8 – 4.7)                                                     | 0.0001          | 2.8 (2.2 – 5.3)                                                                      | 0.0020          | 0.2 (0.1 – 0.3)                                            | 0.0001          |

|         |                 |        |                 |        |                 |        |
|---------|-----------------|--------|-----------------|--------|-----------------|--------|
| Females | 3.4 (2.3 – 4.6) | 0.0010 | 2.5 (0.9 – 3.9) | 0.0007 | 0.1 (0.1– 0.2)  | 0.0020 |
| Males   | 3.5 (2.7 – 4.3) | 0.0005 | 2.7 (1.0 – 4.1) | 0.0009 | 0.1 (0.1 – 0.2) | 0.0021 |

300

301 As shown in Table 2, diarrhoea hospitalisation in all ages is predicted to  
302 increase by 5.1% and 7.4% under the 1.5°C and 2°C GWLs, respectively. Diarrhoea  
303 hospitalisation in children under 5 years of age may be increased by 5.9% (95% CI:  
304 5.7 – 7.1 ) under the 1.5°C and by 7.8% (95% CI: 7.6 – 9.4) under the 2°C GWL.  
305 With a projected rise in Dhaka’s temperature by 4.3°C by the 2100, diarrhoea  
306 hospitalisation could rise by 15.9% and 20.2% in all ages and ≤5 children,  
307 respectively. Compared to all age groups, temperature increases under all scenarios  
308 showed higher impacts in children under 5 years of age. The impact of temperature  
309 increase on diarrhoea hospitalisation varied by gender with a slightly higher influence  
310 in males compared to females (5.1 – 6.8% Vs 5.8 – 7.0%) (Table 2). If the baseline  
311 relationship from 2010 between meteorological factors and diarrhoea hospitalisation  
312 risk and all other factors including population remain constant in the future, an  
313 increase in mean temperature by 0.91°C, 1.5°C, 2°C or 4.3°C could result in 4,760,  
314 7,840, 10,360 and 22,260 additional diarrhoea hospitalisations annually in Dhaka  
315 Hospital by the 2100, respectively. Applying the same baseline risk as Dhaka, a  
316 temperature increase of 4.3°C by the 2100 could result in 385,955 additional  
317 hospitalisations across Bangladesh annually.



318 **Table 2. Impacts of projected temperature increase on diarrhoea**  
 319 **hospitalisation risk in Dhaka Bangladesh under various climate change**  
 320 **scenarios.**

| Subgroup       | Relative risk (%) of diarrhoea hospitalisation |                          |                                                          |                                                      |
|----------------|------------------------------------------------|--------------------------|----------------------------------------------------------|------------------------------------------------------|
|                | With 1.5°C<br>GWL*<br>(95% CI)                 | With 2°C GWL<br>(95% CI) | With 0.91°C<br>predicted<br>increase by<br>2100 (95% CI) | With 4.3°C<br>predicted increase<br>by 2100 (95% CI) |
| All ages       | 5.1 (4.5 – 5.6)                                | 6.8 (6.0 – 7.4)          | 3.1 (2.7 – 3.4)                                          | 14.6 (12.9 – 15.9)                                   |
| ≤5<br>children | 5.9 (5.7 – 7.1 )                               | 7.8 (7.6 – 9.4)          | 3.6 (3.5 – 4.3)                                          | 16.8 (16.3 – 20.2)                                   |
| Females        | 5.1 (3.5 – 6.9)                                | 6.8 (4.6 – 9.2)          | 3.1 (2.1 – 4.2)                                          | 14.6 (9.9 – 19.8)                                    |
| Males          | 5.3 (4.1 – 6.5)                                | 7.0 (5.4 – 8.6)          | 3.2 (2.5 – 3.9)                                          | 15.1 (11.6 – 18.5)                                   |

321 \*GWL: Global Warming Level targeted in the Paris Agreement

322

## 323 Discussion

324 While numerous studies have explored the effects of climate variability on  
 325 diarrhoea worldwide [31], only a small number of studies have attempted to estimate  
 326 the impacts of future climate change on diarrhoea [9, 10, 13]. Using empirical data  
 327 from icddr, Dhaka Hospital, our findings suggest significant baseline burden of  
 328 acute diarrhoeal disease in Dhaka associated with ambient temperature after  
 329 adjusting for the confounding effects of humidity, heavy rainfall, seasonal patterns,  
 330 long-term trend, and day-of-the-week. This risk may aggravate further as climate  
 331 continues to change. Our findings reveal that temperature-related diarrhoeal disease  
 332 could increase by 7.4% in people of all ages and 9.4% in children under 5 years of  
 333 age under the 2°C global warming level compared to the reference period of 1981 –  
 334 2010. This increase would be limited to 5.6% in people of all ages and 7.1% in  
 335 children under 5 years of age if the 1.5°C global warming target could be reached.  
 336 However, diarrhoeal disease hospitalisation could rise by up to 15.9% in all ages and

337 20.2% in children under 5 years if Dhaka's temperature increases by 4.3°C by the  
338 2100 as projected by various climate models [24].

339 With notable improvements in socio-economic condition and healthcare  
340 provision and advances in water, sanitation and hygiene infrastructure in  
341 Bangladesh, diarrhoea mortality in children has declined significantly from 15.1 per  
342 1000 in 1980 to 6.0 per 1000 live births in 2015 [32, 33]. The rate of diarrhoea  
343 hospitalisation in Dhaka Hospital also suggests a declining trend. Despite success in  
344 reduction of diarrhoea mortality, outbreaks and hyperendemicity continue to plague  
345 the nation and diarrhoea remains a major cause of morbidity in Bangladesh for  
346 people in all age groups including children under 5 years of age [16, 34].

347 The baseline risk of diarrhoea hospitalisation with temperature in Dhaka  
348 observed in this study was smaller compared to many studies [31]. Given the high  
349 baseline rates, the temperature-attributable numbers of diarrhoea hospitalisation  
350 were still substantially large. In this study, the observed effects of temperature on  
351 diarrhoea hospitalisation were mostly immediate with negligible effects observed for  
352 up to 28 lag days. This could be linked to an acute mechanism of association, such  
353 as increased consumption of contaminated drinking water or increased food spoilage  
354 during hot weather [35].

355 In this study, diarrhoea hospitalisation decreased with mean temperature at  
356 the lag of 1-day following an initial increase in diarrhoea hospitalisation on the same  
357 day. In environmental epidemiological studies, short-term increase in risk of  
358 diarrhoea followed by a protective effect at a longer lag is known as 'harvesting' or  
359 'short-term displacement' effect [29]. Prior studies eliciting the impact of climate

360 parameters on diarrhoea rarely reported the occurrence of any harvesting effect. Aik  
361 et al (2019) examining climate variability on diarrhoea incidence in Singapore using  
362 time series analysis reported evidence of harvesting effect of diarrhoeal disease due  
363 to relative humidity six weeks later [36]. Another study investigating the influence of  
364 climate on diarrhoea in Vietnam reported evidence of harvesting effect due to rainfall  
365 but did not include the protective effect of rainfall into the final model [37].  
366 Reductions in at-risk population following diarrhoea episodes likely contributed to the  
367 decreased diarrhoea hospitalisations observed the following day. Furthermore,  
368 family members and allies are likely to change their personal hygiene practices, food  
369 preparation behaviour and healthcare seeking practice following the hospitalisation  
370 of an affected member with an episode of diarrhoeal disease, which could also  
371 reduce their risk of suffering and/or hospitalisation for diarrhoea. While evidence of  
372 protective behavioural changes following a diarrhoea episode is scanty, a previous  
373 Norovirus outbreak report suggested that affected passengers of a cruise ship were  
374 three times less likely to indulge in risky behaviour including attending a casino, gym,  
375 on board events or shore side tours compared to unaffected passengers [38].

376 In this study, gender was not found to modify the temperature–diarrhoea  
377 relationship with males and females having nearly similar risk. However, the effect of  
378 mean temperature on diarrhoea was highest among children under 5 years of age.  
379 Compared to adults, young children may be more vulnerable to the effects of  
380 temperature owing to their immature immune system and low self-care capacity [39].  
381 However, one global cross-sectional study did not find any significant relationship  
382 between temperature and diarrhoea in children under 5 years of age [40]. On the  
383 contrary, a study from Ethiopia reported significant effect of temperature on  
384 childhood diarrhoea [41]. Despite the potential vulnerability of children to climate

385 change, empirical studies examining the role of age on the temperature–diarrhoea  
386 relationship are scarce. Future research examining the modulating impacts of age on  
387 climate–diarrhoea relationships can shed further light on this topic.

388 Our study has several strengths and limitations. The estimate of baseline  
389 impact of temperature on diarrhoea is based on high-quality, continuous data  
390 covering a 30–year period from the largest diarrhoea hospital in Dhaka, Bangladesh.  
391 In the context of a low- and middle-income country, the availability of such a dataset  
392 is rather exceptional. Most importantly, the analysis used temperature-diarrhoea  
393 relationship derived from a model that not only considered the effect of temperature  
394 on diarrhoea, but also the combined effects of temperature and other meteorological  
395 parameters including the immediate and lagged effects of humidity and rainfall.  
396 Furthermore, incorporation of WASH factors and other socio-economic indicators  
397 into the model during sensitivity analyses revealing comparable results further  
398 enhanced the confidence in our findings. Nevertheless, some limitations remain.  
399 Hospitalisations for diarrhoeal diseases at the icddr,b Dhaka Hospital may not be  
400 representative of all affected diarrhoea cases from Dhaka. It is believed that for  
401 every patient seeking hospital care for diarrhoea, there are four patients seeking  
402 care at the community [42, 43]. Hospital admissions, therefore, only represent a tip  
403 of the iceberg. Additionally, these represent the more severe cases. However, Dhaka  
404 Hospital is the largest diarrhoea treatment facility in the country and served a  
405 population of about one and a half million in 2010. Furthermore, icddr,b Dhaka  
406 Hospital services are likely to be accessed predominantly by the disadvantaged  
407 group and the surrounding slum dwellers. The estimates from this study are  
408 therefore conservative and likely to underestimate the actual effect of temperature  
409 variations on diarrhoeal disease transmission in Dhaka. Nonetheless, severe cases

410 from the less privileged group are important given that such cases have implications  
411 for healthcare utilisation and may require policy changes to allocate more resources  
412 to improve diarrhoea hospital care in Dhaka. Although less severe cases and the  
413 elite class are less likely to be included, the results of this study comparing  
414 temperature-diarrhoea relationship over time are still valid.

415 Furthermore, climate change impact calculations were based on global  
416 warming targets of 1.5 - 2°C by the 2100. However, as evident from several models  
417 from Bangladesh, this rise in temperature is likely to be reached much sooner and  
418 the temperature of Dhaka could increase by 4.3°C by the 2100. Although climate  
419 models are prone to biases, we calculated the likely impacts based on a few local  
420 climate projections and found that diarrhoea hospitalisations in all ages could  
421 increase by up to 15.9% for Dhaka. In addition, we assumed that the baseline  
422 relationship between meteorological factors and diarrhoea hospitalisation risk will  
423 remain constant in the future. However, future diarrhoea risk will be affected by many  
424 other factors including population density, access to healthcare and vaccines that we  
425 did not aim to model since we wanted to quantify climate change risks only. Although  
426 the role of access to safe water and sanitation were accounted for in the  
427 temperature-diarrhoea relationship estimates during the sensitivity analyses, the  
428 possible effects of other adaptive health policies on diarrhoea including increased  
429 access to vaccines targeting cholera and rotavirus on diarrhoea prevalence and  
430 hospitalisation could not be incorporated in these models due to lack of available  
431 data. However, seasonal adjustment accounted for the variations to some extent. In  
432 the light of the above strengths and limitations, the predicted increase of 3.1 – 15.9%  
433 in diarrhoea hospitalisations with 0.91 – 4.3°C increase in temperature due to climate  
434 change should be considered indicative.

435

## 436 **Conclusions**

437           This study demonstrated a statistically significant relationship between ambient  
438 temperature, relative humidity and heavy rainfall in the sub-tropical city of Dhaka.  
439 Given the high prevalence of diarrhoeal diseases in Bangladesh, even a small  
440 increase in risk stemming from increased environmental temperature in the context of  
441 climate change could lead to substantial burden and overwhelm the healthcare  
442 services in Dhaka. This underscores the importance of preparing the city for  
443 prevention and management of diarrhoeal diseases in anticipation of such increases  
444 in the future.

## 445 **Acknowledgments**

446 This study was completed as a part of a PhD thesis by FH. The authors would like to  
447 thank the Commonwealth Scholarship Commission for funding the PhD study. The  
448 authors would also like to thank members of the Research Administration team of  
449 icddr,b, National Health Foundation and Research Institute (NHF&RI) and  
450 Bangladesh Meteorological Department (BMD) for their support to data collection.

451

## 452 **References**

- 453 1. IPCC, *Climate Change 2021: The Physical Science Basis. Contribution of*  
454 *Working Group I to the Sixth Assessment Report of the Intergovernmental*  
455 *Panel on Climate Change*, Masson-Delmotte, et al., Editors. 2021, Cambridge  
456 University Press.
- 457 2. Cook, J., et al., *Consensus on consensus: a synthesis of consensus estimates*  
458 *on human-caused global warming*. *Environmental Research Letter*, 2016. **11**  
459 (4).
- 460 3. Watts, N., et al., *The 2018 report of the Lancet Countdown on health and*  
461 *climate change: shaping the health of nations for centuries to come*. *Lancet*,  
462 2018. **392**(10163): p. 2479-2514.

- 463 4. Whitmee, S., et al., *Safeguarding human health in the Anthropocene epoch: report of The Rockefeller Foundation-Lancet Commission on planetary health*. Lancet, 2015. **386**(10007): p. 1973-2028.
- 464
- 465
- 466 5. Levy, K., S.M. Smith, and E.J. Carlton, *Climate Change Impacts on Waterborne Diseases: Moving Toward Designing Interventions*. Curr Environ Health Rep, 467 2018. **5**(2): p. 272-282.
- 468
- 469 6. Mellor, J.E., et al., *Planning for climate change: The need for mechanistic systems-based approaches to study climate change impacts on diarrheal diseases*. Sci Total Environ, 2016. **548-549**: p. 82-90.
- 470
- 471
- 472 7. Collaborators, G.B.D.D.D., *Estimates of global, regional, and national morbidity, mortality, and aetiologies of diarrhoeal diseases: a systematic analysis for the Global Burden of Disease Study 2015*. Lancet Infect Dis, 2017. **17**(9): p. 909-948.
- 473
- 474
- 475
- 476 8. Campbell-Lendrum, D.H., C.F. Corvalán, and A. Prüss-Ustün, eds. *How much disease could climate change cause?* Climate change and health. 2003, World Health Organization: Geneva.
- 477
- 478
- 479 9. Kolstad, E.W. and K.A. Johansson, *Uncertainties associated with quantifying climate change impacts on human health: a case study for diarrhea*. Environ Health Perspect, 2011. **119**(3): p. 299-305.
- 480
- 481
- 482 10. Moors, E., et al., *Climate change and waterborne diarrhoea in northern India: impacts and adaptation strategies*. Sci Total Environ, 2013. **468-469 Suppl**: p. S139-51.
- 483
- 484
- 485 11. Singh, R.B., et al., *The influence of climate variation and change on diarrheal disease in the Pacific Islands*. Environ Health Perspect, 2001. **109**(2): p. 155-9.
- 486
- 487
- 488 12. Checkley, W., et al., *Effect of El Nino and ambient temperature on hospital admissions for diarrhoeal diseases in Peruvian children*. Lancet, 2000. **355**(9202): p. 442-50.
- 489
- 490
- 491 13. Hajat, S., et al., *Climate Change and Diarrhoeal Disease Burdens in the Gaza Strip, Palestine: Health Impacts of 1.5 degrees C and 2 degrees C Global Warming Scenarios*. Int J Environ Res Public Health, 2022. **19**(8).
- 492
- 493
- 494 14. Islam, H.M.T., et al., *Spatiotemporal changes in temperature projections over Bangladesh using multi-model ensemble data*. Frontiers in Environmental Science, 2023. **10**.
- 495
- 496
- 497 15. Charles, K.J., et al., *Infrastructure alone cannot ensure resilience to weather events in drinking water supplies*. Sci Total Environ, 2021: p. 151876.
- 498
- 499 16. Haque, F., et al., *Cholera Outbreaks in Urban Bangladesh In 2011*. Epidemiology (Sunnyvale), 2013. **3**.
- 500
- 501 17. UN-Habitat, *State of the World's Cities 2008/2009—Harmonious Cities*. 2008, United Nations Human Settlements Programme: London, UK and Sterling, VA, USA.
- 502
- 503
- 504 18. Mowla, Q. and M. Islam, *Natural Drainage System and Water Logging in Dhaka: Measures to address the Problems*. J. Bangladesh Inst. Plan., 2013. **6**: p. 23-33.
- 505
- 506
- 507 19. Hassan, M.M. and J. Southworth, *Analyzing Land Cover Change and Urban Growth Trajectories of the Mega-Urban Region of Dhaka Using Remotely Sensed Data and an Ensemble Classifier*. Sustainability, 2018. **10**(10).
- 508
- 509
- 510 20. Swapan, M.S.H., et al., *Transforming Urban Dichotomies and Challenges of South Asian Megacities: Rethinking Sustainable Growth of Dhaka, Bangladesh*. Urban Sci, 2017. **1**(31).
- 511
- 512

- 513 21. UN, *World Population Prospects: The 2017 Revision, Key Findings and*  
514 *Advance Tables*. 2017, Department of Economic and Social Affairs, Population  
515 Division: New York.
- 516 22. Stoll, B.J., et al., *Surveillance of patients attending a diarrhoeal disease hospital*  
517 *in Bangladesh*. *Br Med J (Clin Res Ed)*, 1982. **285**(6349): p. 1185-8.
- 518 23. Haque, F., et al., *Effects of diurnal temperature range on diarrhea in the*  
519 *subtropical megacity of Dhaka, Bangladesh*. *The Journal of Climate Change*  
520 *and Health*, 2024. **17**.
- 521 24. Alamgir, M., et al., *Downscaling and Projection of Spatiotemporal Changes in*  
522 *Temperature of Bangladesh*. *Earth Systems and Environment* 2019. **3**.
- 523 25. *The Cost of Adapting to Extreme Weather Events in a Changing Climate*, in  
524 *Bangladesh Development Series*, T.W. Bank, Editor. 2011, The World Bank  
525 Dhaka
- 526 26. Rahman, M.M., et al., *Rainfall and temperature scenarios for Bangladesh for*  
527 *the middle of 21st century using RegCM*. *J Earth Syst Sci* 2012. **121**: p. 287–  
528 295.
- 529 27. *Climate: Observations, projections and impacts*. 2011, UK Met Office Hadley  
530 Centre Exeter, Devon, United Kingdom.
- 531 28. Shourav, M.S.A., et al., *Historical trends and future projections of climate at*  
532 *Dhaka City of Bangladesh* *Jurnal Teknologi (Sciences & Engineering)*, 2016.  
533 **78**: p. 69-75.
- 534 29. Bhaskaran, K., et al., *Time series regression studies in environmental*  
535 *epidemiology*. *Int J Epidemiol*, 2013. **42**(4): p. 1187-95.
- 536 30. Hardin, J.W. and J.M. Hilbe, eds. *Generalized Linear Models and Extensions*  
537 2nd ed. 2007, Stata Press: Texas 77845.
- 538 31. Carlton, E.J., et al., *A systematic review and meta-analysis of ambient*  
539 *temperature and diarrhoeal diseases*. *Int J Epidemiol*, 2016. **45**(1): p. 117-30.
- 540 32. Billah, S.M., et al., *Bangladesh: a success case in combating childhood*  
541 *diarrhoea*. *J Glob Health*, 2019. **9**(2): p. 020803.
- 542 33. Black, R., et al., *Drivers of the reduction in childhood diarrhea mortality 1980-*  
543 *2015 and interventions to eliminate preventable diarrhea deaths by 2030*. *J*  
544 *Glob Health*, 2019. **9**(2): p. 020801.
- 545 34. Haque, F., *Impacts of temperature, diurnal temperature range, heat index and*  
546 *heat wave on diarrhoeal diseases in Dhaka, Bangladesh in the context of*  
547 *climate change: A time-series analysis*, in *Institute for Global Health (IGH)*.  
548 2022, University College London (UCL): London
- 549 35. Levy, K., et al., *Untangling the Impacts of Climate Change on Waterborne*  
550 *Diseases: a Systematic Review of Relationships between Diarrheal Diseases*  
551 *and Temperature, Rainfall, Flooding, and Drought*. *Environ Sci Technol*, 2016.  
552 **50**(10): p. 4905-22.
- 553 36. Aik, J., J. Ong, and L.C. Ng, *The effects of climate variability and seasonal*  
554 *influence on diarrhoeal disease in the tropical city-state of Singapore - A time-*  
555 *series analysis*. *Int J Hyg Environ Health*, 2020. **227**: p. 113517.
- 556 37. Phung, D., et al., *Heavy rainfall and risk of infectious intestinal diseases in the*  
557 *most populous city in Vietnam*. *Sci Total Environ*, 2017. **580**: p. 805-812.
- 558 38. Wikswa, M.E., et al., *Disease transmission and passenger behaviors during a*  
559 *high morbidity Norovirus outbreak on a cruise ship, January 2009*. *Clin Infect*  
560 *Dis*, 2011. **52**(9): p. 1116-22.
- 561 39. Xu, Z., et al., *Is diurnal temperature range a risk factor for childhood diarrhea?*  
562 *PLoS One*, 2013. **8**(5): p. e64713.



- 563 40. Lloyd, S.J., R.S. Kovats, and B.G. Armstrong, *Global diarrhoea morbidity,*  
564 *weather and climate*. *Clim Res*, 2007. **34**: p. 119–127.
- 565 41. Azage, M., et al., *Effect of climatic variability on childhood diarrhea and its high*  
566 *risk periods in northwestern parts of Ethiopia*. *PLoS One*, 2017. **12**(10): p.  
567 e0186933.
- 568 42. Nhampossa, T., et al., *Health care utilization and attitudes survey in cases of*  
569 *moderate-to-severe diarrhea among children ages 0-59 months in the District*  
570 *of Manhica, southern Mozambique*. *Am J Trop Med Hyg*, 2013. **89**(1 Suppl): p.  
571 41-48.
- 572 43. Sultana, R., et al., *Cost of illness for severe and non-severe diarrhea borne by*  
573 *households in a low-income urban community of Bangladesh: A cross-sectional*  
574 *study*. *PLoS Negl Trop Dis*, 2021. **15**(6): p. e0009439.

575

## 576 **Supporting information**

577 **S1 File. Additional information on health data.**

578 **S2 File. Sensitivity analyses.**

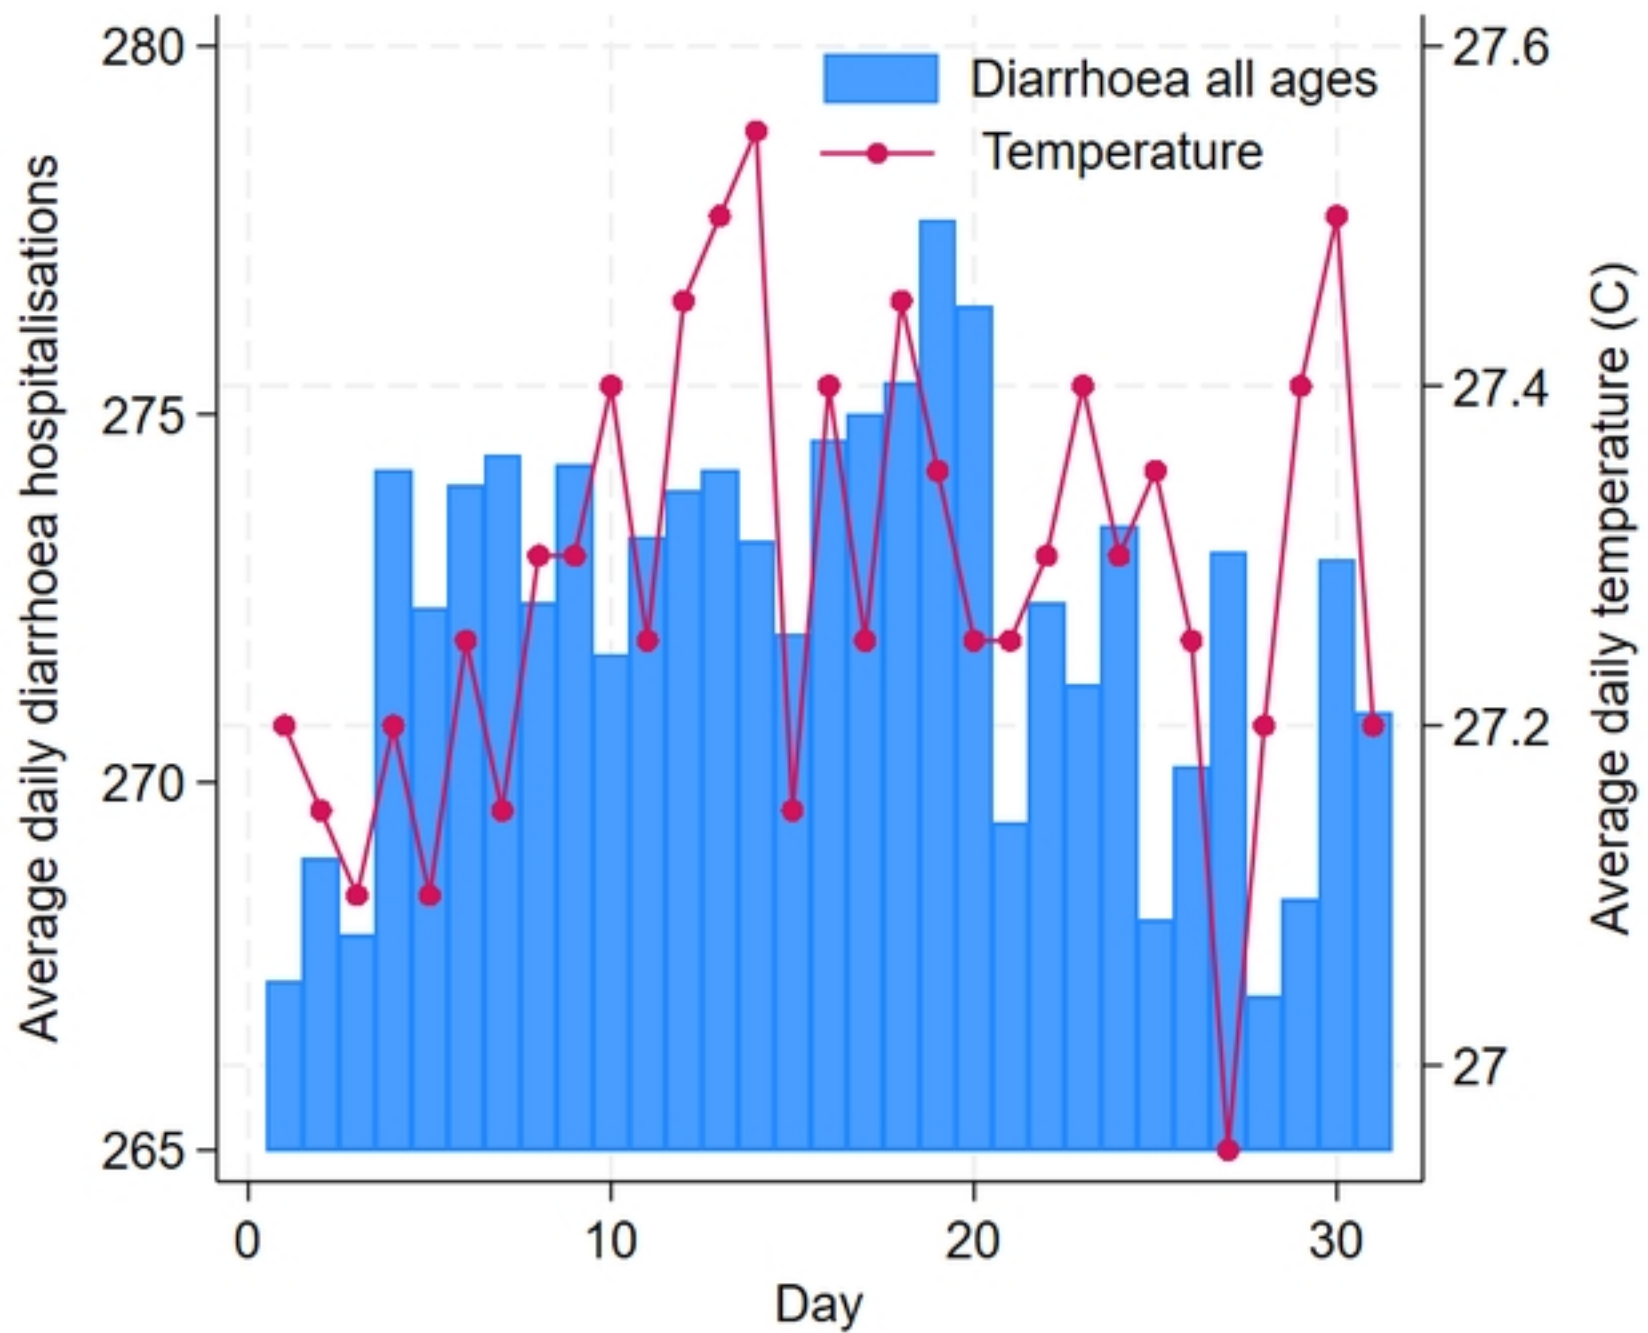

Figure 1

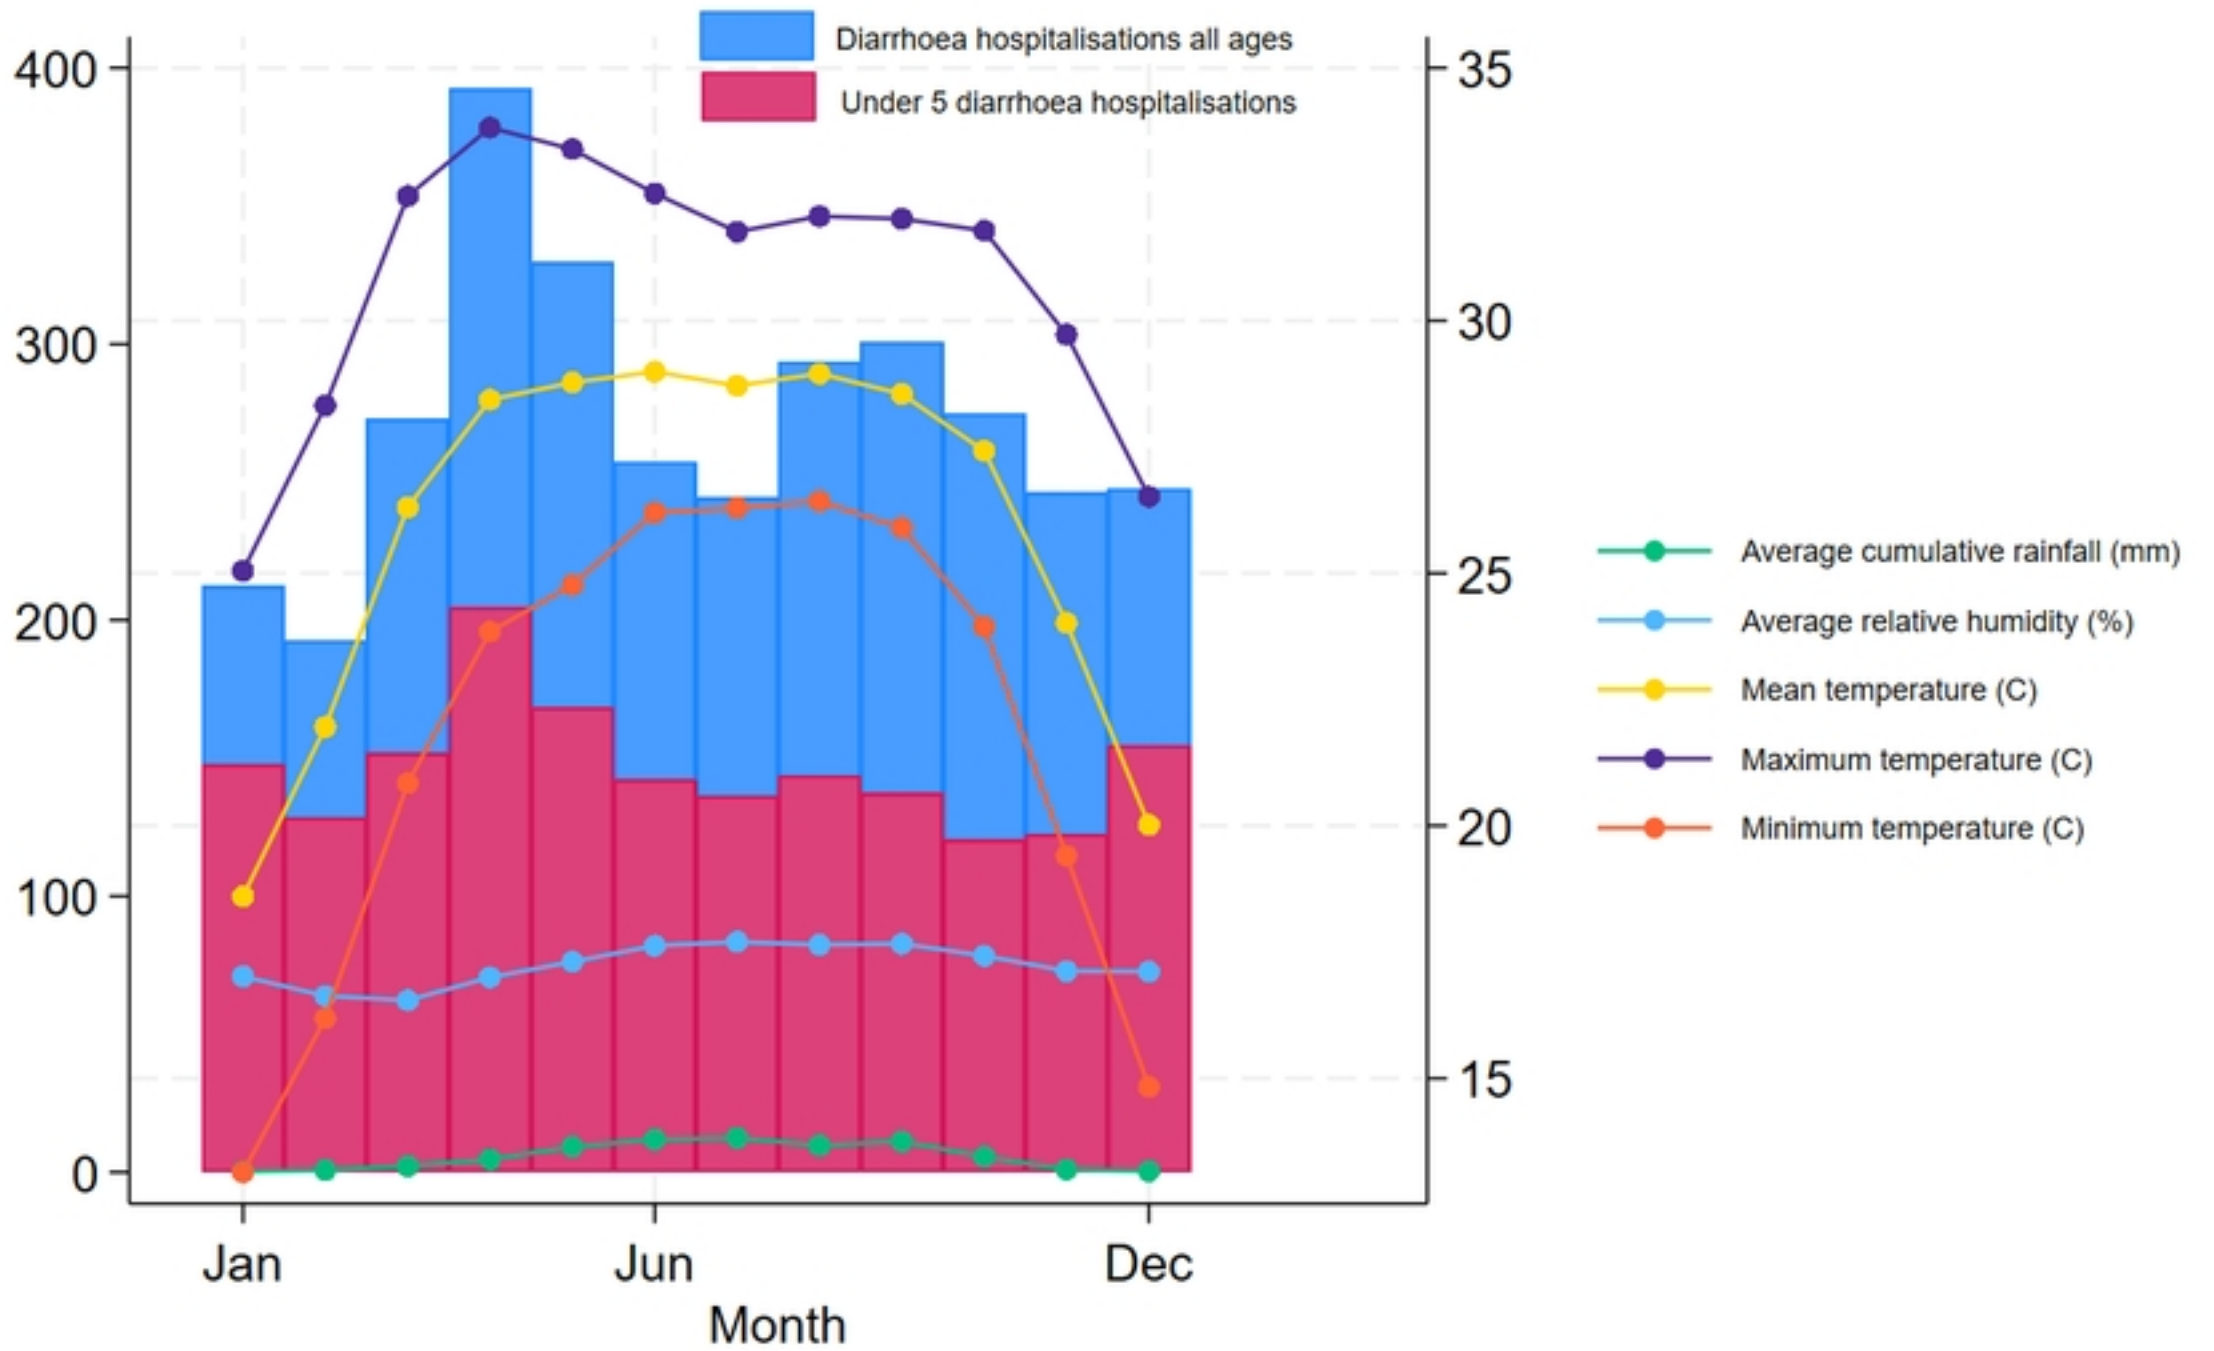

Figure 2

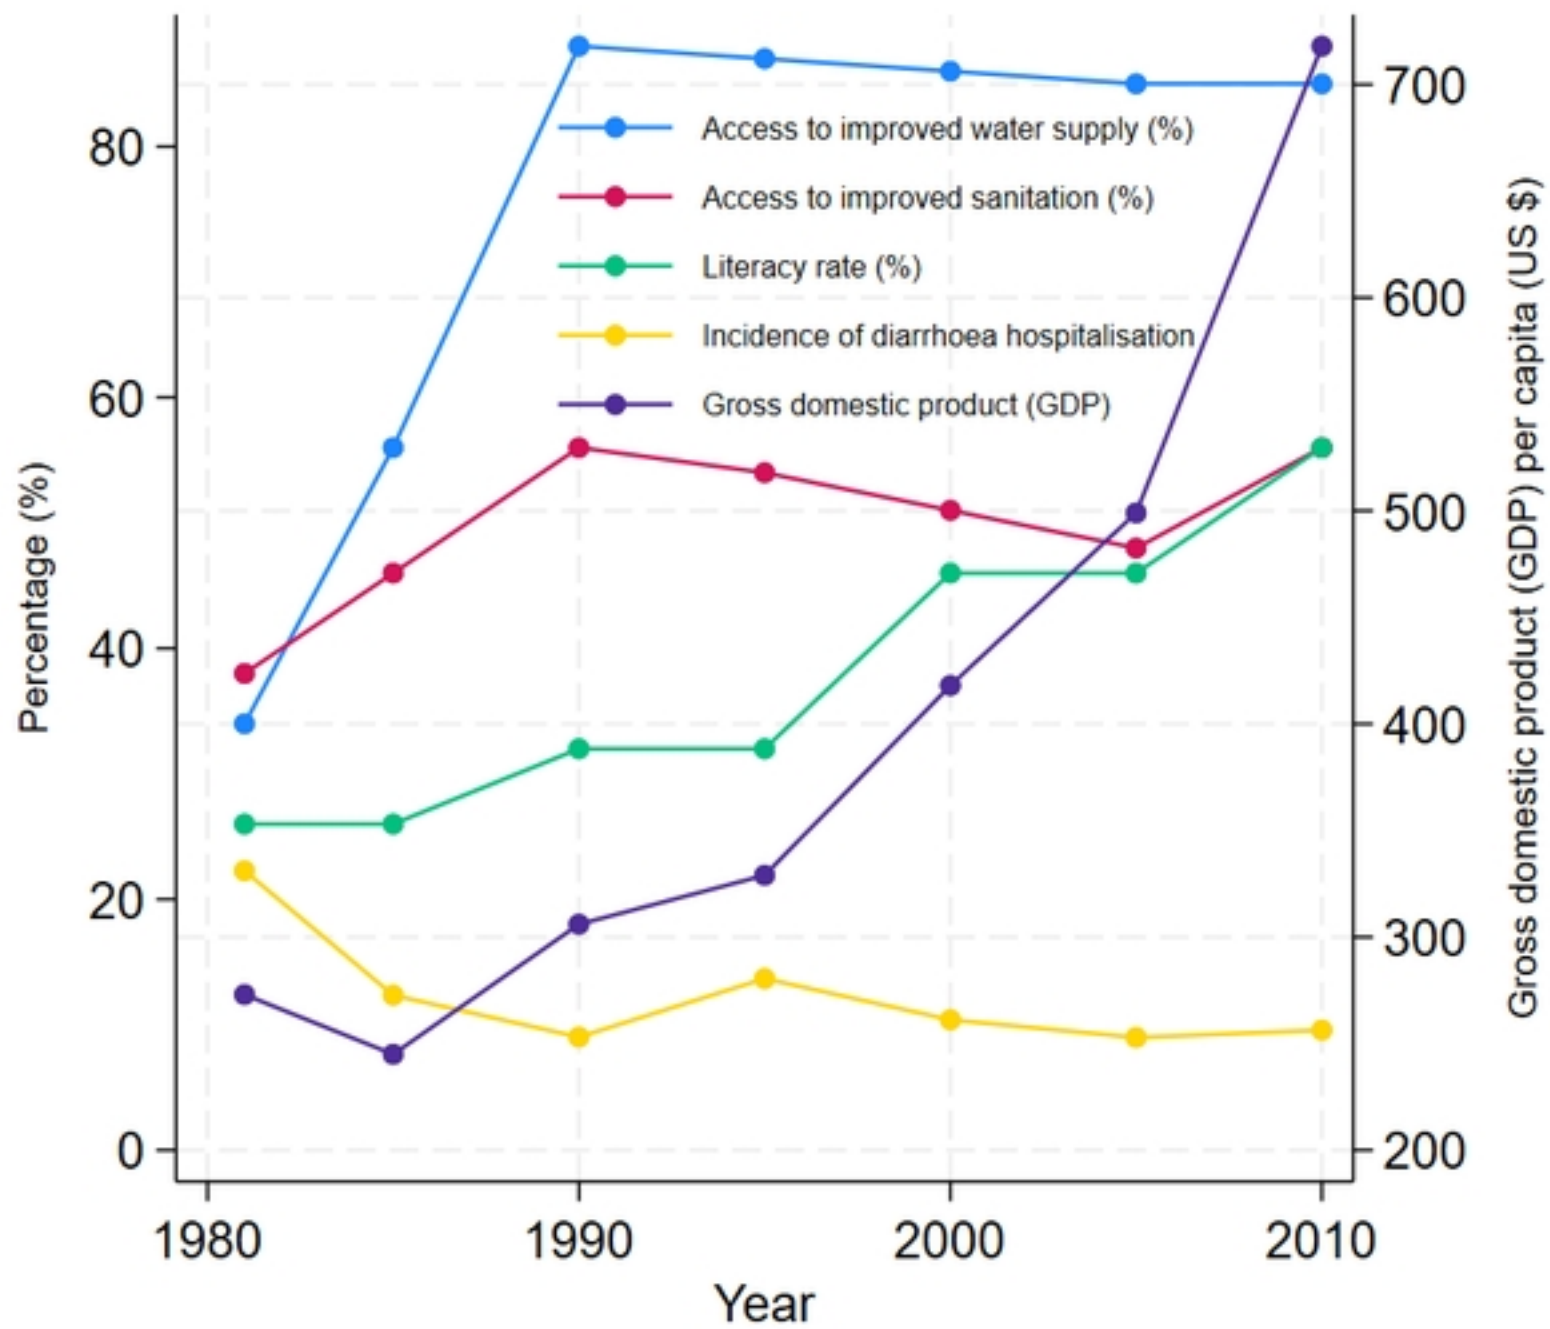

Figure 3

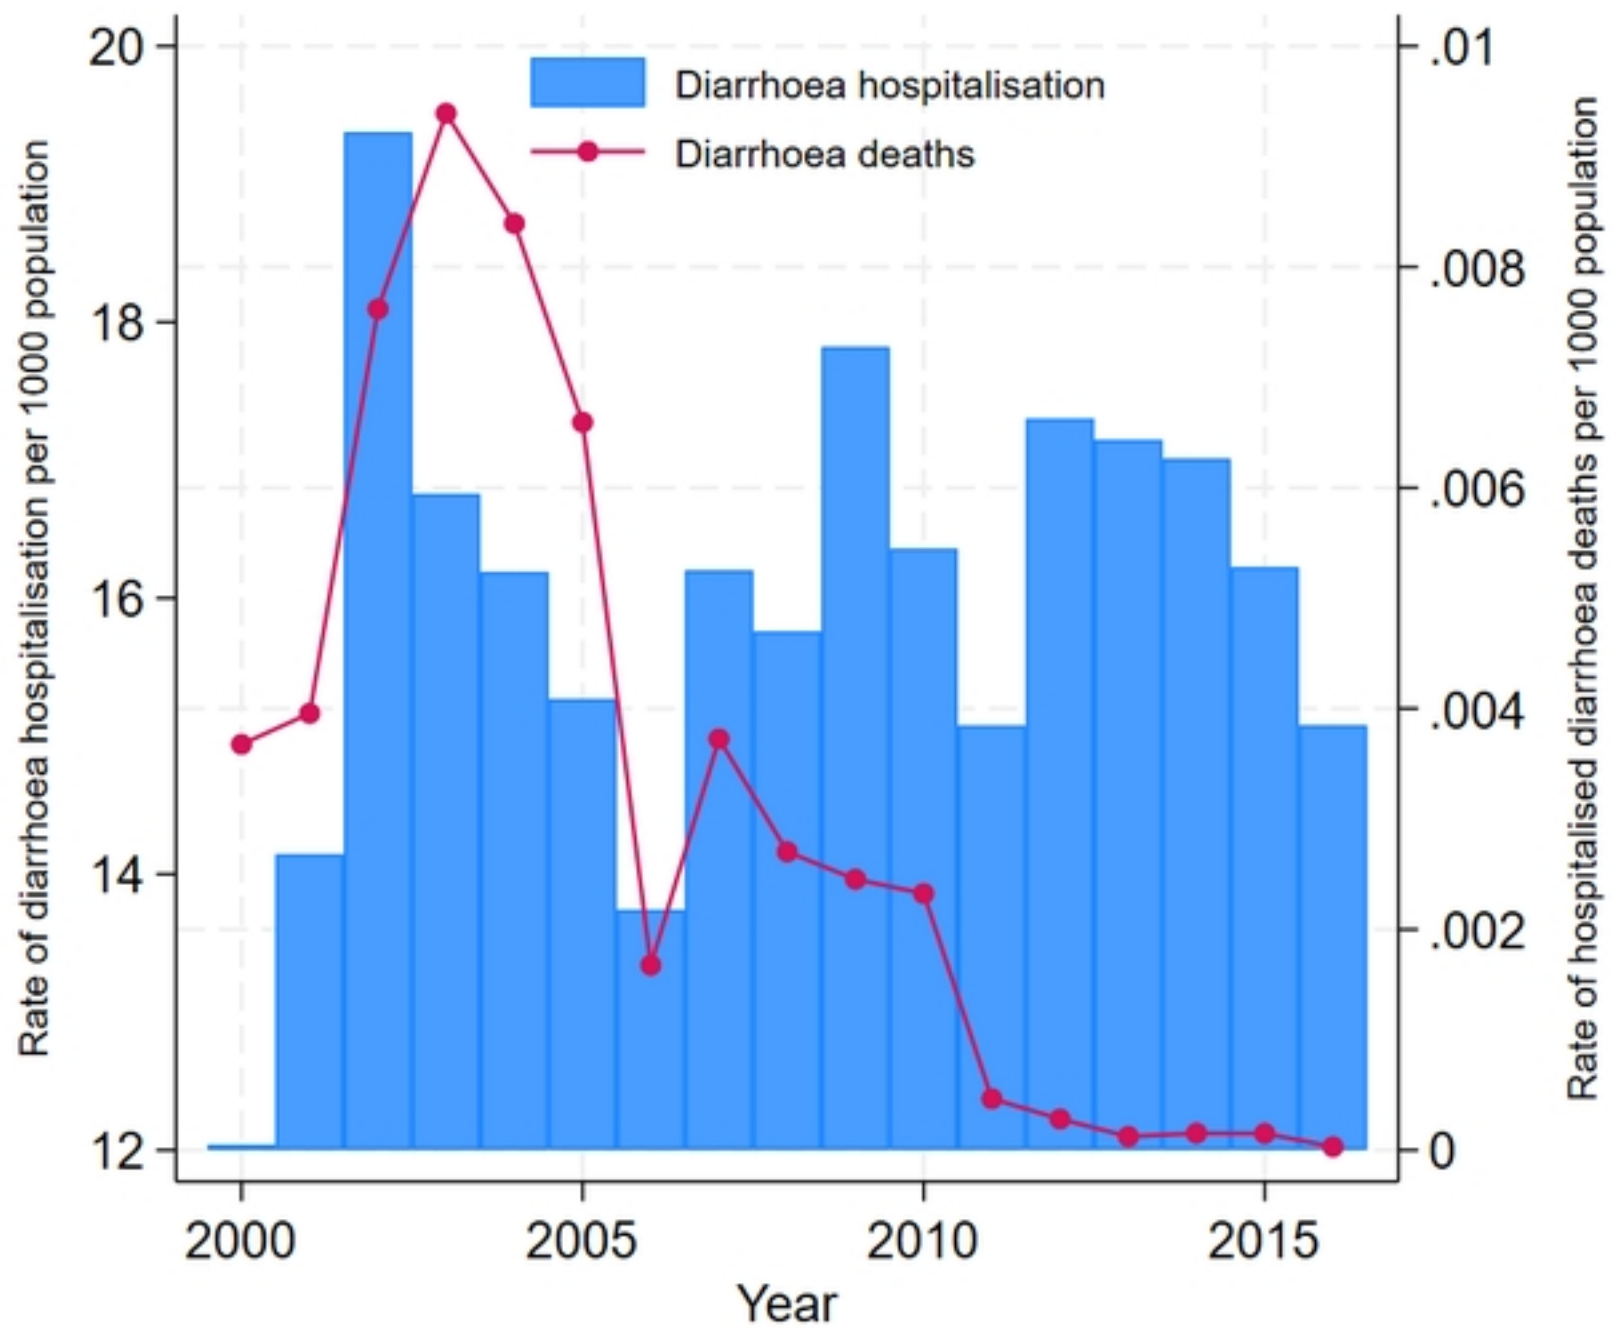

Figure 4

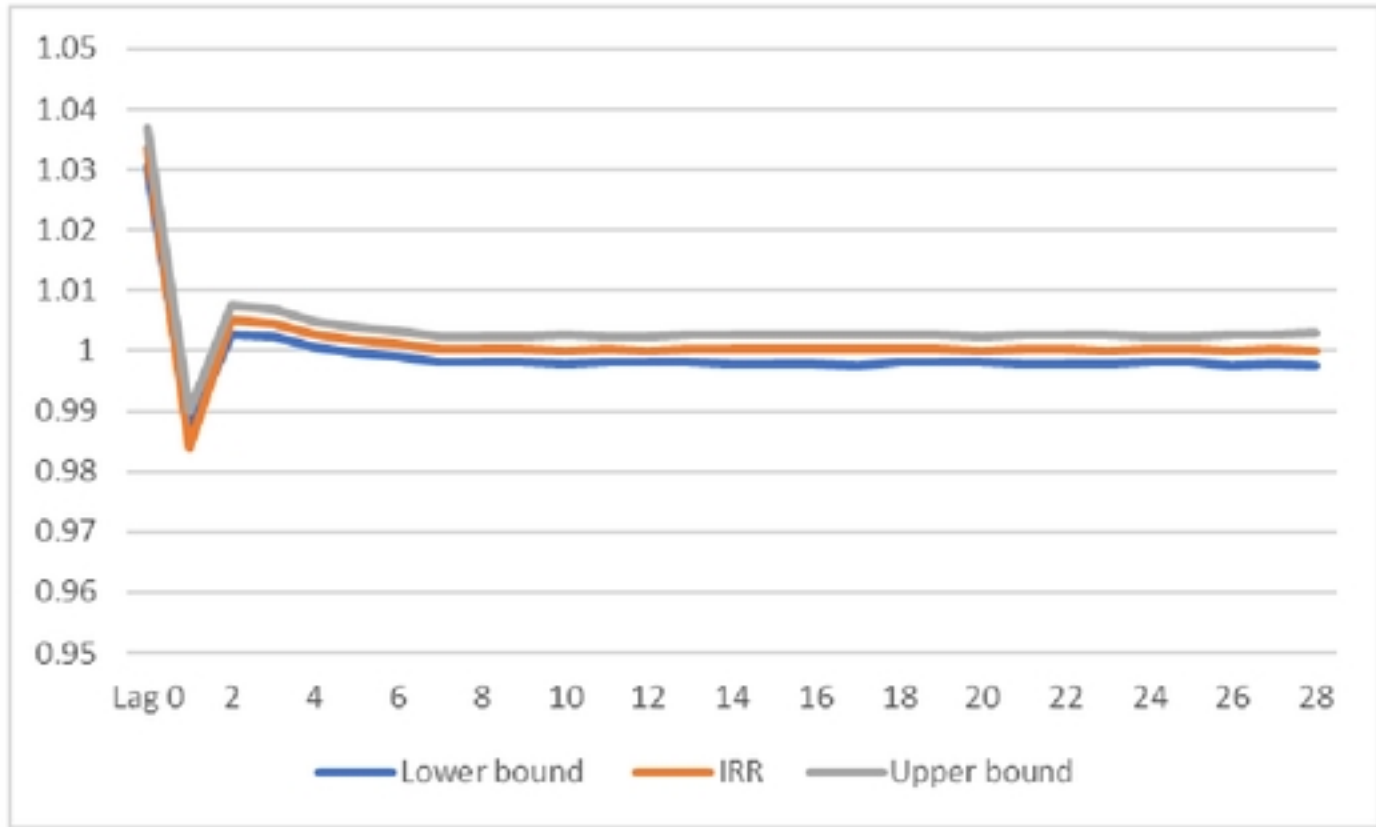

medRxiv preprint doi: <https://doi.org/10.1101/2024.04.10.24305607>; this version posted April 12, 2024. The copyright holder for this preprint (which was not certified by peer review) is the author/funder, who has granted medRxiv a license to display the preprint in perpetuity. It is made available under a [CC-BY-NC 4.0 International license](https://creativecommons.org/licenses/by-nc/4.0/).

Figure 5
